# Supplementary material for: Efficient solvent-assisted external treatment for planar heterojunction small-molecule organic solar cells
Source: Royal Society of Chemistry journal article supplement (doi:10.1039/c4ta01154f), 2014-01-01
Supplement: c4ta01154f1.pdf [file c4ta01154f1.pdf]

## Supporting Information

### Efficient solvent-assisted external treatment for planar heterojunction small molecule organic solar cells

Jinhyun Kim,<sup>1</sup> Ilsu Heo,<sup>1</sup> Dasom Park,<sup>1</sup> Sang Jung Ahn,<sup>2</sup> Sung-Yeon Jang,<sup>1\*</sup> Sanggyu Yim<sup>1\*</sup>

<sup>1</sup>*Department of Chemistry, Kookmin University, Seoul 136-702, Korea*

<sup>2</sup>*Korea Research Institute of Standard and Science, Daejeon 305-340, Korea*

\*Email: [syjang@kookmin.ac.kr](mailto:syjang@kookmin.ac.kr), Phone: 82-2-910-5768

[sgyim@kookmin.ac.kr](mailto:sgyim@kookmin.ac.kr), Phone: 82-2-910-4734

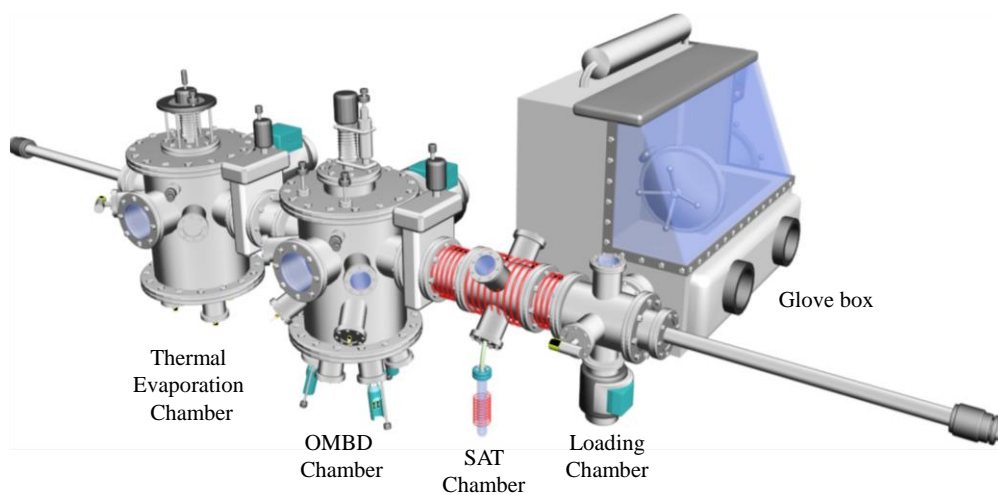

**Figure S1.** Schematic illustration of our cell fabrication equipment. A solvent treatment chamber is connected to an OMBD chamber to achieve SAT at reduced pressure.

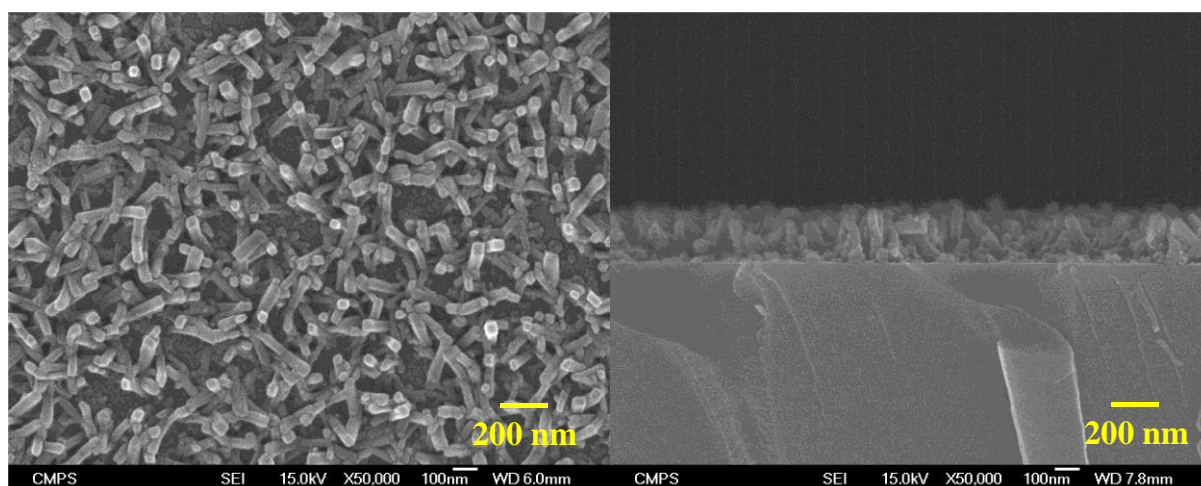

**Figure S2.** FE-SEM images of ZnPc nanopillars. This ZnPc nanopillar-containing film was used to obtain a pre-SAT cell (Cell-C) by sequentially depositing C<sub>60</sub>.

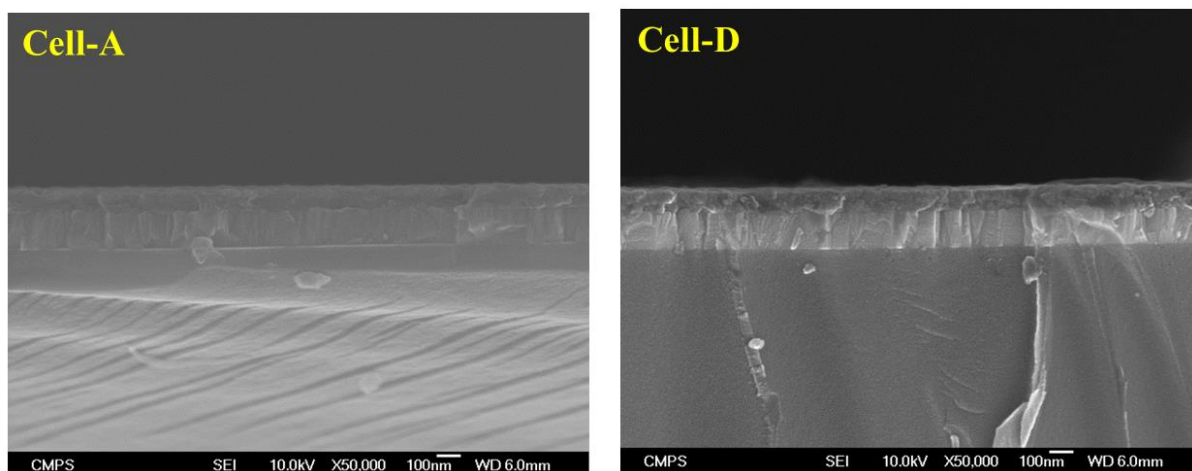

**Figure S3.** Cross-sectional FE-SEM images of ZnPc/C<sub>60</sub> active layers before (Cell-A) and after (Cell-D) post-SAT.

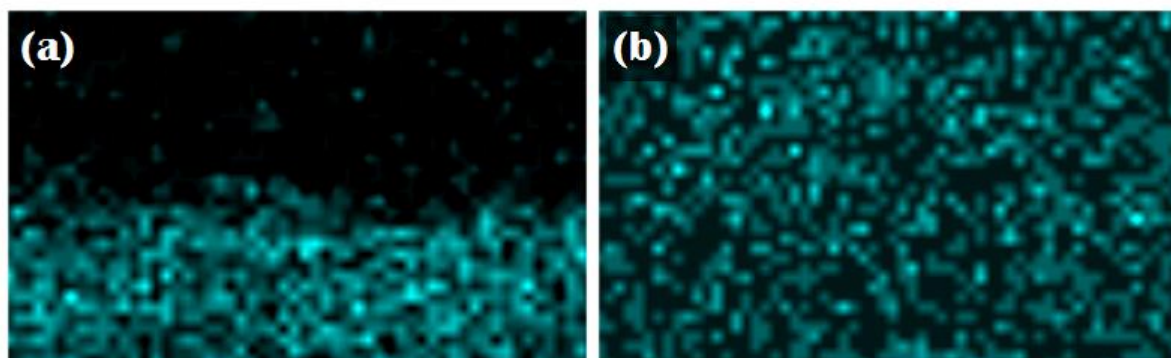

**Figure S4.** Cross-sectional TEM-mapping images for Zn atoms of the ZnPc/C<sub>60</sub> active layers (a) before (Cell-A) and (b) after (Cell-D) post-SAT.

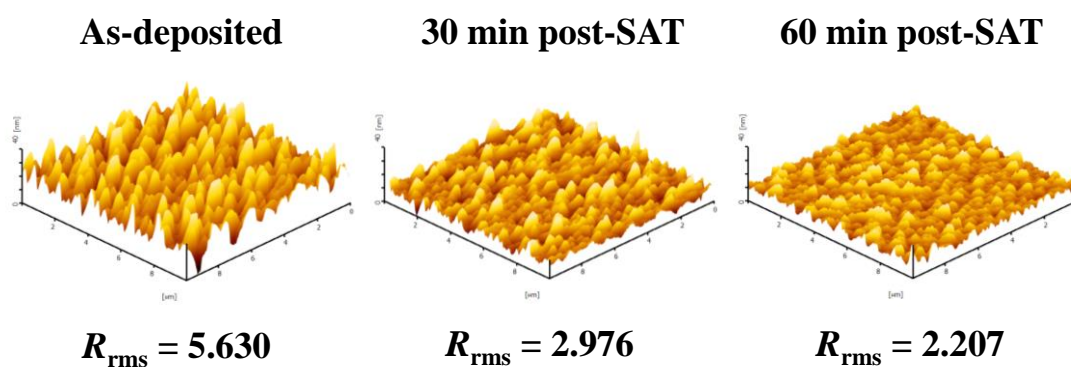

**Figure S5.** AFM images of ZnPc/C<sub>60</sub> layers. The root-mean-square roughness ( $R_{\text{rms}}$ ) of the as-deposited layers became gradually smoother during 60 minutes of post-SAT.

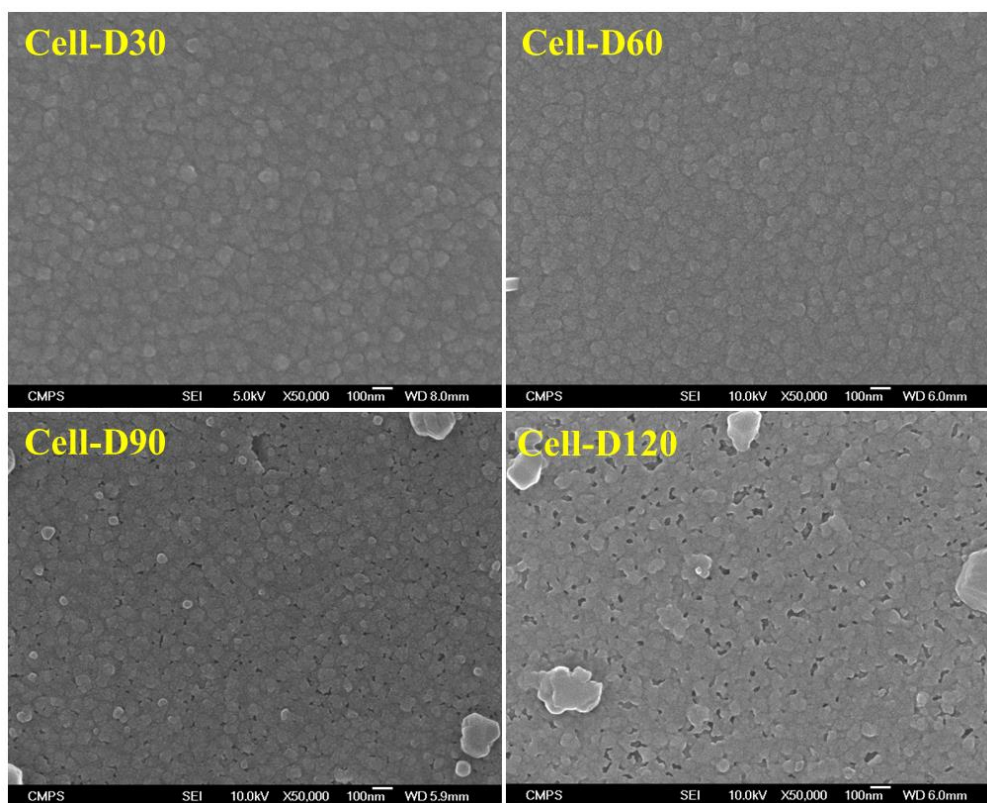

**Figure S6.** Surface FE-SEM images of ZnPc/C<sub>60</sub> active layers after post-SAT. The numbers after the cell labels indicate the SAT duration in minutes.
